# Supplementary material for: Tick diversity and molecular detection of Anaplasma, Babesia, and Theileria from Khao Kheow open zoo, Chonburi Province, Thailand
Source: Frontiers journal article supplement (doi:10.3389/fvets.2024.1430892), 2024-07-01
Supplement: Data_Sheet_1.PDF [file Data_Sheet_1.PDF]

**Supplementary Table 1**

| Label<br>(pool<br>samples) | Tick's<br>stage | Methods  | Host/Habitat            | No. of<br>ticks | Primer:<br>EHR 16SD/16SR<br>(Anaplasmataceae) | Primer:<br>989-F/990-R<br>( <i>Theileria</i> spp.) | Primer:<br>Bab-F/Bab-R<br>( <i>Babesia</i> spp.) |
|----------------------------|-----------------|----------|-------------------------|-----------------|-----------------------------------------------|----------------------------------------------------|--------------------------------------------------|
| 001                        | Larvae          | Dragging | Tapir (stall)           | 50              | 0                                             | 0                                                  | 0                                                |
| 002                        | Larvae          | Dragging | Tapir (stall)           | 50              | 0                                             | 0                                                  | 0                                                |
| 003                        | Larvae          | Dragging | Tapir (stall)           | 50              | 0                                             | 0                                                  | 0                                                |
| 004                        | Larvae          | Dragging | Tapir (stall)           | 50              | 0                                             | 0                                                  | 0                                                |
| 005                        | Larvae          | Dragging | Tapir (stall)           | 50              | 0                                             | 0                                                  | 0                                                |
| 006                        | Larvae          | Dragging | Tapir (stall)           | 50              | 0                                             | 0                                                  | 0                                                |
| 007                        | Larvae          | Dragging | Tapir (stall)           | 50              | 0                                             | 0                                                  | 0                                                |
| 008                        | Larvae          | Dragging | Tapir (stall)           | 50              | 0                                             | 0                                                  | 0                                                |
| 009                        | Larvae          | Dragging | Tapir (stall)           | 50              | 0                                             | 0                                                  | 0                                                |
| 010                        | Larvae          | Dragging | Tapir (stall)           | 50              | 0                                             | 0                                                  | 0                                                |
| 011                        | Larvae          | Dragging | Tapir (stall)           | 50              | 0                                             | 0                                                  | 0                                                |
| 012                        | Larvae          | Dragging | Tapir (stall)           | 5               | 0                                             | 0                                                  | 0                                                |
| 013                        | Larvae          | Dragging | Tapir (stall)           | 1               | 1                                             | 0                                                  | 0                                                |
| 014                        | Larvae          | Dragging | Male eld's deer (stall) | 50              | 0                                             | 0                                                  | 0                                                |
| 015                        | Larvae          | Dragging | Male eld's deer (stall) | 50              | 0                                             | 0                                                  | 0                                                |
| 016                        | Larvae          | Dragging | Male eld's deer (stall) | 50              | 0                                             | 0                                                  | 0                                                |
| 017                        | Larvae          | Dragging | Male eld's deer (stall) | 40              | 0                                             | 0                                                  | 0                                                |
| 018                        | Larvae          | Dragging | Male eld's deer (stall) | 3               | 0                                             | 0                                                  | 0                                                |
| 019                        | Nymph           | Dragging | Tapir (stall)           | 10              | 0                                             | 0                                                  | 0                                                |
| 020                        | Nymph           | Dragging | Tapir (stall)           | 1               | 0                                             | 0                                                  | 0                                                |
| 021                        | Nymph           | Dragging | Male eld's deer (stall) | 1               | 0                                             | 0                                                  | 0                                                |
| 022                        | Nymph           | Picking  | Tapir                   | 1               | 0                                             | 0                                                  | 0                                                |
| 023                        | Nymph           | Picking  | Tapir                   | 1               | 0                                             | 0                                                  | 0                                                |
| 024                        | Nymph           | Picking  | Tapir                   | 1               | 0                                             | 0                                                  | 0                                                |

|     |        |          |                         |    |   |   |   |
|-----|--------|----------|-------------------------|----|---|---|---|
| 025 | Nymph  | Picking  | Tapir                   | 1  | 0 | 0 | 0 |
| 026 | Nymph  | Picking  | Tapir                   | 1  | 1 | 0 | 0 |
| 027 | Nymph  | Picking  | Tapir                   | 1  | 1 | 0 | 1 |
| 028 | Nymph  | Picking  | Tapir                   | 1  | 1 | 0 | 0 |
| 029 | Nymph  | Picking  | Tapir                   | 1  | 0 | 0 | 0 |
| 030 | Nymph  | Picking  | Tapir                   | 1  | 0 | 0 | 0 |
| 031 | Nymph  | Picking  | Tapir                   | 1  | 0 | 0 | 0 |
| 032 | Nymph  | Picking  | Tapir                   | 1  | 1 | 0 | 0 |
| 033 | Nymph  | Picking  | Tapir                   | 1  | 1 | 0 | 0 |
| 034 | M      | Picking  | Tapir                   | 1  | 1 | 0 | 0 |
| 035 | F      | Picking  | Tapir                   | 1  | 1 | 0 | 0 |
| 036 | F      | Picking  | Tapir                   | 1  | 1 | 0 | 0 |
| 037 | Larvae | Dragging | Tapir (stall)           | 48 | 0 | 0 | 0 |
| 038 | Larvae | Dragging | Male eld's deer (stall) | 50 | 0 | 0 | 1 |
| 039 | Larvae | Dragging | Male eld's deer (stall) | 50 | 0 | 1 | 0 |
| 040 | Larvae | Dragging | Male eld's deer (stall) | 50 | 0 | 0 | 0 |
| 041 | Larvae | Dragging | Male eld's deer (stall) | 50 | 0 | 1 | 1 |
| 042 | Larvae | Dragging | Male eld's deer (stall) | 50 | 0 | 0 | 1 |
| 043 | Larvae | Dragging | Male eld's deer (stall) | 50 | 0 | 0 | 1 |
| 044 | Larvae | Dragging | Male eld's deer (stall) | 50 | 0 | 0 | 1 |
| 045 | Larvae | Dragging | Male eld's deer (stall) | 50 | 0 | 0 | 1 |
| 046 | Larvae | Dragging | Male eld's deer (stall) | 50 | 0 | 0 | 1 |
| 047 | Larvae | Dragging | Male eld's deer (stall) | 50 | 0 | 0 | 1 |
| 048 | Larvae | Dragging | Male eld's deer (stall) | 21 | 0 | 0 | 0 |
| 049 | Larvae | Dragging | Male eld's deer (stall) | 10 | 0 | 0 | 0 |
| 050 | Larvae | Dragging | Male eld's deer (stall) | 50 | 0 | 0 | 0 |
| 051 | Larvae | Dragging | Male eld's deer (stall) | 50 | 0 | 0 | 1 |
| 052 | Larvae | Dragging | Male eld's deer (stall) | 50 | 0 | 0 | 1 |
| 053 | Larvae | Dragging | Male eld's deer (stall) | 50 | 0 | 0 | 0 |

|     |       |          |                         |   |   |   |   |
|-----|-------|----------|-------------------------|---|---|---|---|
| 054 | Nymph | Dragging | Tapir (stall)           | 2 | 0 | 0 | 1 |
| 055 | Nymph | Dragging | Male eld's deer (stall) | 1 | 1 | 1 | 1 |
| 056 | M     | Picking  | Tapir                   | 1 | 1 | 0 | 0 |
| 057 | M     | Picking  | Tapir                   | 1 | 1 | 0 | 0 |
| 058 | F     | Picking  | Tapir                   | 1 | 1 | 0 | 0 |
| 059 | F     | Picking  | Tapir                   | 1 | 1 | 0 | 0 |
| 060 | M     | Picking  | Tapir                   | 1 | 1 | 0 | 0 |
| 061 | F     | Picking  | Tapir                   | 1 | 1 | 0 | 0 |
| 062 | F     | Picking  | Tapir                   | 1 | 1 | 0 | 0 |
| 063 | F     | Picking  | Tapir                   | 1 | 1 | 0 | 0 |
| 064 | M     | Picking  | Tapir                   | 1 | 1 | 0 | 0 |
| 065 | F     | Picking  | Tapir                   | 1 | 1 | 0 | 0 |
| 066 | F     | Picking  | Tapir                   | 1 | 1 | 0 | 0 |
| 067 | F     | Picking  | Tapir                   | 1 | 1 | 0 | 0 |
| 068 | M     | Picking  | Tapir                   | 1 | 1 | 0 | 0 |
| 069 | M     | Picking  | Tapir                   | 1 | 1 | 0 | 0 |
| 070 | F     | Picking  | Tapir                   | 1 | 1 | 0 | 0 |
| 071 | F     | Picking  | Tapir                   | 1 | 1 | 0 | 0 |
| 072 | F     | Picking  | Tapir                   | 1 | 1 | 0 | 0 |
| 073 | F     | Picking  | Tapir                   | 1 | 1 | 0 | 0 |
| 074 | F     | Picking  | Tapir                   | 1 | 1 | 0 | 0 |
| 075 | F     | Picking  | Tapir                   | 1 | 1 | 0 | 0 |
| 076 | F     | Picking  | Tapir                   | 1 | 1 | 0 | 0 |
| 077 | F     | Picking  | Tapir                   | 1 | 1 | 0 | 0 |
| 078 | M     | Picking  | Tapir                   | 1 | 1 | 0 | 0 |
| 079 | F     | Picking  | Tapir                   | 1 | 1 | 0 | 0 |
| 080 | F     | Picking  | Tapir                   | 1 | 1 | 0 | 0 |
| 081 | F     | Picking  | Tapir                   | 1 | 1 | 0 | 0 |
| 082 | F     | Picking  | Tapir                   | 1 | 1 | 0 | 0 |

|     |       |         |                   |   |   |   |   |
|-----|-------|---------|-------------------|---|---|---|---|
| 083 | F     | Picking | Tapir             | 1 | 1 | 0 | 0 |
| 084 | F     | Picking | Tapir             | 1 | 1 | 0 | 0 |
| 085 | F     | Picking | Tapir             | 1 | 1 | 0 | 0 |
| 086 | F     | Picking | Tapir             | 1 | 1 | 0 | 0 |
| 087 | F     | Picking | Tapir             | 1 | 1 | 0 | 0 |
| 088 | F     | Picking | Tapir             | 1 | 1 | 0 | 0 |
| 089 | F     | Picking | Tapir             | 1 | 1 | 0 | 0 |
| 090 | F     | Picking | Tapir             | 1 | 1 | 0 | 0 |
| 091 | F     | Picking | Tapir             | 1 | 1 | 0 | 0 |
| 092 | F     | Picking | Tapir             | 1 | 1 | 0 | 0 |
| 093 | F     | Picking | Deer              | 1 | 1 | 0 | 0 |
| 094 | F     | Picking | Deer              | 1 | 1 | 0 | 0 |
| 095 | M     | Picking | Deer              | 1 | 0 | 0 | 0 |
| 096 | M     | Picking | Deer              | 1 | 1 | 0 | 0 |
| 097 | M     | Picking | Deer              | 1 | 1 | 0 | 0 |
| 098 | M     | Picking | Deer              | 1 | 0 | 0 | 0 |
| 099 | M     | Picking | Deer              | 1 | 1 | 0 | 0 |
| 100 | F     | Picking | Deer              | 1 | 0 | 0 | 0 |
| 101 | F     | Picking | Deer              | 1 | 1 | 0 | 0 |
| 102 | M     | Picking | Female Barasingha | 1 | 0 | 0 | 0 |
| 103 | F     | Picking | Female Barasingha | 1 | 0 | 0 | 0 |
| 104 | F     | Picking | Female Barasingha | 1 | 0 | 0 | 0 |
| 105 | F     | Picking | Female Barasingha | 1 | 0 | 0 | 0 |
| 106 | F     | Picking | Female Barasingha | 1 | 0 | 0 | 0 |
| 107 | F     | Picking | Female Barasingha | 1 | 0 | 0 | 0 |
| 108 | F     | Picking | Female Barasingha | 1 | 0 | 0 | 0 |
| 109 | Nymph | Picking | Male Barasingha   | 3 | 0 | 0 | 0 |
| 110 | Nymph | Picking | Male Barasingha   | 1 | 0 | 0 | 0 |
| 111 | F     | Picking | Male Barasingha   | 1 | 0 | 0 | 0 |

|     |        |          |                         |    |   |   |   |
|-----|--------|----------|-------------------------|----|---|---|---|
| 112 | F      | Picking  | Male Barasingha         | 1  | 0 | 0 | 0 |
| 113 | M      | Picking  | Male Barasingha         | 1  | 1 | 0 | 0 |
| 114 | F      | Picking  | Male Barasingha         | 1  | 0 | 0 | 0 |
| 115 | M      | Picking  | Male Barasingha         | 1  | 0 | 0 | 0 |
| 116 | F      | Picking  | Male Barasingha         | 1  | 0 | 0 | 0 |
| 117 | F      | Picking  | Male Barasingha         | 1  | 0 | 0 | 0 |
| 118 | F      | Picking  | Male Barasingha         | 1  | 1 | 0 | 0 |
| 119 | M      | Picking  | Male Barasingha         | 1  | 0 | 0 | 0 |
| 120 | M      | Picking  | Male Barasingha         | 1  | 0 | 0 | 0 |
| 121 | F      | Picking  | Male Barasingha         | 1  | 0 | 0 | 0 |
| 122 | Larvae | Dragging | Male eld's deer (stall) | 50 | 0 | 0 | 0 |
| 123 | Larvae | Dragging | Male eld's deer (stall) | 50 | 1 | 0 | 0 |
| 124 | Larvae | Dragging | Male eld's deer (stall) | 50 | 1 | 1 | 1 |
| 125 | Larvae | Dragging | Male eld's deer (stall) | 50 | 0 | 0 | 1 |
| 126 | Larvae | Dragging | Male eld's deer (stall) | 50 | 0 | 1 | 1 |
| 127 | Larvae | Dragging | Male eld's deer (stall) | 50 | 1 | 1 | 1 |
| 128 | Larvae | Dragging | Male eld's deer (stall) | 50 | 0 | 1 | 1 |
| 129 | Larvae | Dragging | Male eld's deer (stall) | 50 | 0 | 1 | 1 |
| 130 | Larvae | Dragging | Male eld's deer (stall) | 50 | 0 | 1 | 1 |
| 131 | Larvae | Dragging | Male eld's deer (stall) | 19 | 1 | 0 | 1 |
| 132 | Larvae | Dragging | Tapir                   | 6  | 0 | 0 | 1 |
| 133 | Nymph  | Picking  | Male eld's deer (stall) | 1  | 1 | 0 | 0 |
| 134 | Nymph  | Picking  | Tapir                   | 1  | 1 | 0 | 0 |
| 135 | Nymph  | Picking  | Male eld's deer (stall) | 9  | 1 | 0 | 0 |
| 136 | Nymph  | Picking  | Male eld's deer (stall) | 10 | 0 | 0 | 1 |
| 137 | Nymph  | Picking  | Male eld's deer (stall) | 10 | 0 | 0 | 1 |
| 138 | Nymph  | Picking  | Male eld's deer (stall) | 11 | 0 | 0 | 1 |
| 139 | F      | Picking  | Male eld's deer (stall) | 1  | 0 | 0 | 0 |
| 140 | F      | Picking  | Male eld's deer (stall) | 1  | 0 | 0 | 0 |

|     |        |          |                         |    |   |   |   |
|-----|--------|----------|-------------------------|----|---|---|---|
| 141 | F      | Picking  | Male eld's deer (stall) | 1  | 0 | 0 | 0 |
| 142 | Nymph  | Picking  | Spotted deer            | 1  | 1 | 1 | 0 |
| 143 | Nymph  | Picking  | Spotted deer            | 1  | 1 | 1 | 0 |
| 144 | Nymph  | Picking  | Spotted deer            | 1  | 1 | 0 | 0 |
| 145 | Nymph  | Picking  | Spotted deer            | 1  | 1 | 1 | 0 |
| 146 | F      | Picking  | Spotted deer            | 1  | 0 | 0 | 0 |
| 147 | F      | Picking  | Spotted deer            | 1  | 1 | 0 | 0 |
| 148 | F      | Picking  | Spotted deer            | 1  | 1 | 0 | 0 |
| 149 | F      | Picking  | Spotted deer            | 1  | 0 | 0 | 0 |
| 150 | F      | Picking  | Spotted deer            | 1  | 0 | 0 | 0 |
| 151 | F      | Picking  | Deer                    | 1  | 0 | 0 | 0 |
| 152 | F      | Picking  | Deer                    | 1  | 1 | 0 | 0 |
| 153 | M      | Picking  | Deer                    | 1  | 0 | 0 | 0 |
| 154 | M      | Picking  | Deer                    | 1  | 1 | 0 | 0 |
| 155 | F      | Picking  | Deer                    | 1  | 0 | 0 | 0 |
| 156 | Larvae | Dragging | Male eld's deer (stall) | 50 | 0 | 0 | 1 |
| 157 | Larvae | Dragging | Male eld's deer (stall) | 50 | 0 | 0 | 0 |
| 158 | Larvae | Dragging | Male eld's deer (stall) | 50 | 1 | 0 | 1 |
| 159 | Larvae | Dragging | Male eld's deer (stall) | 50 | 1 | 0 | 1 |
| 160 | Larvae | Dragging | Male eld's deer (stall) | 50 | 1 | 0 | 1 |
| 161 | Larvae | Dragging | Male eld's deer (stall) | 50 | 1 | 1 | 1 |
| 162 | Larvae | Dragging | Male eld's deer (stall) | 50 | 1 | 1 | 1 |
| 163 | Larvae | Dragging | Male eld's deer (stall) | 50 | 1 | 0 | 1 |
| 164 | Larvae | Dragging | Male eld's deer (stall) | 50 | 1 | 1 | 1 |
| 165 | Larvae | Dragging | Male eld's deer (stall) | 50 | 1 | 0 | 1 |
| 166 | Larvae | Dragging | Male eld's deer (stall) | 50 | 1 | 0 | 1 |
| 167 | Larvae | Dragging | Male eld's deer (stall) | 50 | 1 | 0 | 1 |
| 168 | Larvae | Dragging | Male eld's deer (stall) | 50 | 1 | 0 | 1 |
| 169 | Larvae | Dragging | Male eld's deer (stall) | 50 | 1 | 1 | 0 |

|     |        |          |                         |    |   |   |   |
|-----|--------|----------|-------------------------|----|---|---|---|
| 170 | Larvae | Dragging | Male eld's deer (stall) | 50 | 1 | 0 | 1 |
| 171 | Larvae | Dragging | Male eld's deer (stall) | 50 | 0 | 0 | 1 |
| 172 | Larvae | Dragging | Male eld's deer (stall) | 50 | 0 | 0 | 1 |
| 173 | Larvae | Dragging | Male eld's deer (stall) | 50 | 0 | 0 | 1 |
| 174 | Larvae | Dragging | Male eld's deer (stall) | 50 | 0 | 0 | 1 |
| 175 | Larvae | Dragging | Male eld's deer (stall) | 50 | 0 | 0 | 1 |
| 176 | Larvae | Dragging | Male eld's deer (stall) | 50 | 1 | 1 | 1 |
| 177 | Larvae | Dragging | Tapir                   | 4  | 1 | 0 | 1 |
| 178 | Larvae | Dragging | Male eld's deer (stall) | 50 | 1 | 0 | 1 |
| 179 | Larvae | Dragging | Male eld's deer (stall) | 50 | 1 | 0 | 1 |
| 180 | Larvae | Dragging | Male eld's deer (stall) | 50 | 1 | 0 | 1 |
| 181 | Larvae | Dragging | Male eld's deer (stall) | 50 | 1 | 0 | 1 |
| 182 | Larvae | Dragging | Male eld's deer (stall) | 50 | 1 | 0 | 1 |
| 183 | Larvae | Dragging | Male eld's deer (stall) | 50 | 1 | 1 | 1 |
| 184 | Larvae | Dragging | Male eld's deer (stall) | 50 | 1 | 1 | 1 |
| 185 | Larvae | Dragging | Male eld's deer (stall) | 50 | 1 | 0 | 1 |
| 186 | Larvae | Dragging | Male eld's deer (stall) | 50 | 1 | 0 | 1 |
| 187 | Larvae | Dragging | Male eld's deer (stall) | 50 | 1 | 0 | 1 |
| 188 | Larvae | Dragging | Male eld's deer (stall) | 50 | 1 | 1 | 1 |
| 189 | Larvae | Dragging | Male eld's deer (stall) | 50 | 1 | 1 | 1 |
| 190 | Larvae | Dragging | Male eld's deer (stall) | 50 | 1 | 1 | 1 |
| 191 | Larvae | Dragging | Male eld's deer (stall) | 50 | 1 | 1 | 1 |
| 192 | Larvae | Dragging | Male eld's deer (stall) | 50 | 1 | 1 | 1 |
| 193 | Larvae | Dragging | Male eld's deer (stall) | 50 | 1 | 1 | 1 |
| 194 | Larvae | Dragging | Male eld's deer (stall) | 50 | 1 | 1 | 1 |
| 195 | Larvae | Dragging | Male eld's deer (stall) | 50 | 1 | 1 | 1 |
| 196 | Larvae | Dragging | Male eld's deer (stall) | 50 | 1 | 1 | 1 |
| 197 | Larvae | Dragging | Male eld's deer (stall) | 50 | 1 | 1 | 1 |
| 198 | Larvae | Dragging | Male eld's deer (stall) | 5  | 1 | 0 | 1 |

|     |        |          |                         |    |   |   |   |
|-----|--------|----------|-------------------------|----|---|---|---|
| 199 | Larvae | Dragging | Male eld's deer (stall) | 3  | 1 | 1 | 0 |
| 200 | Larvae | Dragging | Male eld's deer (stall) | 34 | 1 | 1 | 0 |
| 201 | F      | Picking  | Rusa deer               | 1  | 0 | 0 | 0 |
| 202 | F      | Picking  | Rusa deer               | 1  | 0 | 0 | 0 |
| 203 | F      | Picking  | Rusa deer               | 1  | 0 | 0 | 0 |
| 204 | F      | Picking  | Rusa deer               | 1  | 0 | 0 | 0 |
| 205 | Nymph  | Dragging | Tapir                   | 3  | 0 | 0 | 0 |
| 206 | Nymph  | Dragging | Tapir                   | 9  | 0 | 0 | 0 |
| 207 | Larvae | Dragging | Tapir                   | 14 | 0 | 0 | 0 |
| 208 | Larvae | Dragging | Tapir                   | 44 | 0 | 0 | 0 |
| 209 | Larvae | Dragging | Tapir                   | 1  | 0 | 0 | 0 |
| 210 | F      | Picking  | Deer                    | 1  | 0 | 0 | 0 |
| 211 | F      | Picking  | Deer                    | 1  | 0 | 0 | 0 |
| 212 | F      | Picking  | Deer                    | 1  | 0 | 0 | 0 |
| 213 | M      | Picking  | Deer                    | 1  | 0 | 0 | 0 |
| 214 | F      | Picking  | Male eld's deer         | 1  | 0 | 0 | 0 |
| 215 | F      | Picking  | Male eld's deer         | 1  | 0 | 0 | 0 |
| 216 | Nymph  | Picking  | Female barking deer     | 10 | 0 | 0 | 0 |
| 217 | Nymph  | Picking  | Female barking deer     | 2  | 0 | 0 | 0 |
| 218 | Nymph  | Picking  | Male eld's deer         | 1  | 0 | 0 | 0 |
| 219 | F      | Picking  | Male hybrid cow         | 1  | 0 | 0 | 0 |
| 220 | F      | Picking  | Male hybrid cow         | 1  | 0 | 0 | 0 |
| 221 | F      | Picking  | Male hybrid cow         | 1  | 0 | 0 | 0 |
| 222 | F      | Picking  | Male hybrid cow         | 1  | 1 | 0 | 0 |
| 223 | M      | Picking  | Male hybrid cow         | 1  | 1 | 1 | 0 |
| 224 | M      | Picking  | Male hybrid cow         | 1  | 1 | 1 | 1 |
| 225 | F      | Picking  | Tapir                   | 1  | 1 | 0 | 0 |
| 226 | F      | Picking  | Tapir                   | 1  | 1 | 0 | 0 |
| 227 | F      | Picking  | Tapir                   | 1  | 1 | 0 | 0 |



|     |   |         |                      |   |   |   |   |
|-----|---|---------|----------------------|---|---|---|---|
| 228 | M | Picking | Tapir                | 1 | 1 | 0 | 0 |
| 229 | F | Picking | Tapir                | 1 | 1 | 0 | 0 |
| 230 | F | Picking | Tapir                | 1 | 0 | 0 | 0 |
| 231 | F | Picking | Tapir                | 1 | 0 | 0 | 0 |
| 232 | F | Picking | Tapir                | 1 | 0 | 0 | 0 |
| 233 | F | Picking | Tapir                | 1 | 0 | 0 | 0 |
| 234 | M | Picking | Tapir                | 1 | 1 | 0 | 0 |
| 235 | M | Picking | Tapir                | 1 | 1 | 0 | 0 |
| 236 | M | Picking | Tapir                | 1 | 0 | 0 | 0 |
| 237 | F | Picking | Tapir                | 1 | 0 | 0 | 0 |
| 238 | M | Picking | Tapir                | 1 | 0 | 0 | 0 |
| 239 | M | Picking | Tapir                | 1 | 0 | 0 | 0 |
| 240 | M | Picking | Tapir                | 1 | 0 | 0 | 0 |
| 241 | M | Picking | Tapir                | 1 | 0 | 0 | 0 |
| 242 | M | Picking | Tapir                | 1 | 0 | 0 | 0 |
| 243 | F | Picking | Hornbill             | 1 | 0 | 0 | 0 |
| 244 | F | Picking | Hornbill             | 1 | 0 | 0 | 0 |
| 245 | F | Picking | Hornbill             | 1 | 0 | 0 | 0 |
| 246 | F | Picking | Hornbill             | 1 | 0 | 0 | 0 |
| 247 | M | Picking | Tapir (had medicine) | 1 | 1 | 1 | 1 |
| 248 | M | Picking | Tapir (had medicine) | 1 | 1 | 0 | 0 |
| 249 | M | Picking | Tapir (had medicine) | 1 | 1 | 0 | 0 |
| 250 | M | Picking | Tapir (had medicine) | 1 | 1 | 0 | 0 |
| 251 | M | Picking | Tapir (had medicine) | 1 | 1 | 0 | 0 |
| 252 | M | Picking | Tapir (had medicine) | 1 | 1 | 0 | 0 |
| 253 | M | Picking | Tapir (had medicine) | 1 | 1 | 0 | 0 |
| 254 | M | Picking | Tapir (had medicine) | 1 | 1 | 0 | 0 |
| 255 | F | Picking | Tapir (had medicine) | 1 | 0 | 0 | 0 |
| 256 | F | Picking | Tapir (had medicine) | 1 | 1 | 0 | 0 |

|     |        |          |                         |    |   |   |   |
|-----|--------|----------|-------------------------|----|---|---|---|
| 257 | M      | Picking  | Tapir (had medicine)    | 1  | 1 | 0 | 0 |
| 258 | M      | Picking  | Tapir (had medicine)    | 1  | 1 | 0 | 0 |
| 259 | M      | Picking  | Tapir (had medicine)    | 1  | 1 | 0 | 0 |
| 260 | M      | Picking  | Tapir (had medicine)    | 1  | 1 | 0 | 0 |
| 261 | F      | Picking  | Tapir                   | 1  | 1 | 0 | 0 |
| 262 | F      | Picking  | Tapir                   | 1  | 0 | 0 | 0 |
| 263 | Nymph  | Picking  | Tapir                   | 10 | 0 | 0 | 0 |
| 264 | F      | Picking  | Female barking deer     | 1  | 0 | 0 | 0 |
| 265 | F      | Picking  | Female barking deer     | 1  | 0 | 0 | 0 |
| 266 | Larvae | Dragging | Tapir (stall)           | 50 | 1 | 0 | 0 |
| 267 | Larvae | Dragging | Tapir (stall)           | 17 | 1 | 0 | 0 |
| 268 | Larvae | Dragging | Male eld's deer (stall) | 50 | 1 | 0 | 0 |
| 269 | Larvae | Dragging | Male eld's deer (stall) | 50 | 1 | 0 | 0 |
| 270 | Larvae | Dragging | Male eld's deer (stall) | 50 | 1 | 0 | 0 |
| 271 | Larvae | Dragging | Male eld's deer (stall) | 50 | 1 | 0 | 0 |
| 272 | Larvae | Dragging | Male eld's deer (stall) | 50 | 1 | 0 | 0 |
| 273 | Larvae | Dragging | Male eld's deer (stall) | 50 | 1 | 0 | 0 |
| 274 | Larvae | Dragging | Male eld's deer (stall) | 50 | 1 | 0 | 0 |
| 275 | Larvae | Dragging | Male eld's deer (stall) | 50 | 1 | 0 | 0 |
| 276 | Larvae | Dragging | Male eld's deer (stall) | 50 | 1 | 0 | 0 |
| 277 | Nymph  | Dragging | Tapir (stall)           | 10 | 0 | 0 | 0 |
| 278 | Nymph  | Dragging | Tapir (stall)           | 10 | 0 | 0 | 0 |
| 279 | Nymph  | Dragging | Tapir (stall)           | 4  | 0 | 0 | 0 |
| 280 | Nymph  | Dragging | Male eld's deer (stall) | 5  | 1 | 0 | 0 |
| 281 | F      | Picking  | Tapir (Typhoon)         | 1  | 0 | 0 | 0 |
| 282 | F      | Picking  | Tapir (Typhoon)         | 1  | 0 | 0 | 0 |
| 283 | F      | Picking  | Tapir (Typhoon)         | 1  | 0 | 0 | 0 |
| 284 | F      | Picking  | Tapir (Typhoon)         | 1  | 0 | 1 | 0 |
| 285 | F      | Picking  | Tapir (Typhoon)         | 1  | 0 | 0 | 1 |

|     |        |          |                         |    |   |   |   |
|-----|--------|----------|-------------------------|----|---|---|---|
| 286 | F      | Picking  | Tapir (Typhoon)         | 1  | 0 | 1 | 0 |
| 287 | F      | Picking  | Tapir (Typhoon)         | 1  | 0 | 0 | 0 |
| 288 | F      | Picking  | Tapir (Typhoon)         | 1  | 0 | 1 | 1 |
| 289 | F      | Picking  | Tapir (Typhoon)         | 1  | 0 | 0 | 1 |
| 290 | F      | Picking  | Tapir (Typhoon)         | 1  | 0 | 1 | 0 |
| 291 | M      | Picking  | Tapir (Typhoon)         | 1  | 0 | 1 | 0 |
| 292 | F      | Picking  | Tapir (Nawin)           | 1  | 0 | 1 | 0 |
| 293 | F      | Picking  | Tapir (Nawin)           | 1  | 0 | 1 | 1 |
| 294 | F      | Picking  | Tapir (Nawin)           | 1  | 0 | 1 | 1 |
| 295 | F      | Picking  | Tapir (Nawin)           | 1  | 0 | 1 | 1 |
| 296 | F      | Picking  | Tapir (Nawin)           | 1  | 1 | 0 | 0 |
| 297 | F      | Picking  | Tapir (Nawin)           | 1  | 1 | 0 | 0 |
| 298 | F      | Picking  | Tapir (Nawin)           | 1  | 1 | 0 | 0 |
| 299 | F      | Picking  | Tapir (Nawin)           | 1  | 1 | 0 | 0 |
| 300 | M      | Picking  | Tapir (Nawin)           | 1  | 1 | 0 | 0 |
| 301 | M      | Picking  | Tapir (Nawin)           | 1  | 1 | 0 | 1 |
| 302 | M      | Picking  | Tapir (Nawin)           | 1  | 1 | 1 | 1 |
| 303 | M      | Picking  | Tapir (Nawin)           | 1  | 1 | 0 | 0 |
| 304 | Nymph  | Dragging | Tapir (stall)           | 5  | 1 | 0 | 0 |
| 305 | Nymph  | Dragging | Male eld's deer (stall) | 1  | 1 | 0 | 0 |
| 306 | Larvae | Dragging | Tapir (stall)           | 50 | 1 | 0 | 0 |
| 307 | Larvae | Dragging | Tapir (stall)           | 50 | 1 | 0 | 0 |
| 308 | Larvae | Dragging | Tapir (stall)           | 14 | 1 | 0 | 0 |
| 309 | Larvae | Dragging | Male eld's deer (stall) | 50 | 1 | 1 | 1 |
| 310 | Larvae | Dragging | Male eld's deer (stall) | 50 | 1 | 1 | 1 |
| 311 | Larvae | Dragging | Male eld's deer (stall) | 50 | 1 | 0 | 1 |
| 312 | Larvae | Dragging | Male eld's deer (stall) | 50 | 1 | 1 | 1 |
| 313 | Larvae | Dragging | Male eld's deer (stall) | 50 | 1 | 1 | 1 |
| 314 | Larvae | Dragging | Male eld's deer (stall) | 50 | 1 | 1 | 1 |

|     |        |          |                         |    |   |   |   |
|-----|--------|----------|-------------------------|----|---|---|---|
| 315 | Larvae | Dragging | Male eld's deer (stall) | 50 | 1 | 0 | 1 |
| 316 | Larvae | Dragging | Male eld's deer (stall) | 50 | 1 | 0 | 1 |
| 317 | Larvae | Dragging | Male eld's deer (stall) | 50 | 1 | 1 | 1 |
| 318 | Larvae | Dragging | Male eld's deer (stall) | 50 | 1 | 0 | 1 |
| 319 | Larvae | Dragging | Male eld's deer (stall) | 8  | 1 | 0 | 1 |
| 320 | Larvae | Dragging | Male eld's deer (stall) | 41 | 1 | 0 | 0 |
| 321 | Larvae | Dragging | Tapir (stall)           | 47 | 1 | 0 | 0 |
| 322 | Nymph  | Dragging | Tapir (stall)           | 9  | 0 | 0 | 1 |
| 323 | Nymph  | Dragging | Male eld's deer (stall) | 2  | 1 | 0 | 0 |
| 324 | Larvae | Dragging | Male eld's deer (stall) | 50 | 1 | 0 | 1 |
| 325 | Larvae | Dragging | Male eld's deer (stall) | 50 | 0 | 1 | 1 |
| 326 | Larvae | Dragging | Male eld's deer (stall) | 50 | 1 | 1 | 1 |
| 327 | Larvae | Dragging | Male eld's deer (stall) | 50 | 1 | 1 | 1 |
| 328 | Larvae | Dragging | Male eld's deer (stall) | 50 | 1 | 0 | 0 |
| 329 | Larvae | Dragging | Male eld's deer (stall) | 50 | 1 | 0 | 1 |
| 330 | Larvae | Dragging | Male eld's deer (stall) | 50 | 1 | 0 | 1 |
| 331 | Larvae | Dragging | Male eld's deer (stall) | 50 | 1 | 0 | 1 |
| 332 | Larvae | Dragging | Male eld's deer (stall) | 50 | 1 | 0 | 1 |
| 333 | Larvae | Dragging | Male eld's deer (stall) | 50 | 1 | 0 | 0 |
| 334 | Larvae | Dragging | Male eld's deer (stall) | 50 | 1 | 1 | 0 |
| 335 | Larvae | Dragging | Male eld's deer (stall) | 50 | 1 | 0 | 1 |
| 336 | Larvae | Dragging | Male eld's deer (stall) | 50 | 1 | 1 | 1 |
| 337 | Larvae | Dragging | Male eld's deer (stall) | 50 | 1 | 1 | 1 |
| 338 | Larvae | Dragging | Male eld's deer (stall) | 50 | 1 | 1 | 1 |
| 339 | Larvae | Dragging | Male eld's deer (stall) | 50 | 1 | 1 | 1 |
| 340 | Larvae | Dragging | Male eld's deer (stall) | 50 | 1 |   | 1 |
| 341 | Larvae | Dragging | Male eld's deer (stall) | 50 | 1 | 1 | 1 |
| 342 | Larvae | Dragging | Male eld's deer (stall) | 50 | 1 | 1 | 1 |
| 343 | Larvae | Dragging | Male eld's deer (stall) | 50 | 1 | 1 | 1 |

|     |        |          |                         |    |   |   |   |
|-----|--------|----------|-------------------------|----|---|---|---|
| 344 | Larvae | Dragging | Male eld's deer (stall) | 50 | 1 | 1 | 1 |
| 345 | Larvae | Dragging | Male eld's deer (stall) | 50 | 1 | 1 | 1 |
| 346 | Larvae | Dragging | Male eld's deer (stall) | 50 | 1 | 0 | 1 |
| 347 | Larvae | Dragging | Male eld's deer (stall) | 50 | 1 | 1 | 1 |
| 348 | Larvae | Dragging | Male eld's deer (stall) | 50 | 1 | 0 | 1 |
| 349 | Larvae | Dragging | Male eld's deer (stall) | 50 | 1 | 0 | 1 |
| 350 | Larvae | Dragging | Male eld's deer (stall) | 50 | 1 | 0 | 1 |
| 351 | Larvae | Dragging | Male eld's deer (stall) | 50 | 1 | 0 | 1 |
| 352 | Larvae | Dragging | Male eld's deer (stall) | 50 | 1 | 0 | 0 |
| 353 | Larvae | Dragging | Male eld's deer (stall) | 50 | 1 | 0 | 0 |
| 354 | Larvae | Dragging | Male eld's deer (stall) | 50 | 1 | 0 | 0 |
| 355 | Larvae | Dragging | Male eld's deer (stall) | 50 | 1 | 0 | 0 |
| 356 | Larvae | Dragging | Male eld's deer (stall) | 50 | 1 | 0 | 0 |
| 357 | Larvae | Dragging | Male eld's deer (stall) | 50 | 1 | 0 | 0 |
| 358 | Larvae | Dragging | Male eld's deer (stall) | 50 | 1 | 0 | 0 |
| 359 | Larvae | Dragging | Male eld's deer (stall) | 50 | 1 | 0 | 0 |
| 360 | Larvae | Dragging | Male eld's deer (stall) | 50 | 1 | 0 | 0 |
| 361 | Larvae | Dragging | Male eld's deer (stall) | 50 | 1 | 0 | 0 |
| 362 | Larvae | Dragging | Male eld's deer (stall) | 50 | 1 | 0 | 0 |
| 363 | Larvae | Dragging | Male eld's deer (stall) | 50 | 1 | 0 | 0 |
| 364 | Larvae | Dragging | Male eld's deer (stall) | 50 | 1 | 0 | 0 |
| 365 | Larvae | Dragging | Male eld's deer (stall) | 50 | 1 | 0 | 0 |
| 366 | Larvae | Dragging | Male eld's deer (stall) | 50 | 1 | 0 | 0 |
| 367 | Larvae | Dragging | Male eld's deer (stall) | 50 | 1 | 0 | 0 |
| 368 | Larvae | Dragging | Male eld's deer (stall) | 50 | 1 | 0 | 0 |
| 369 | Larvae | Dragging | Male eld's deer (stall) | 50 | 1 | 0 | 0 |
| 370 | Larvae | Dragging | Male eld's deer (stall) | 50 | 1 | 0 | 0 |
| 371 | Larvae | Dragging | Male eld's deer (stall) | 50 | 1 | 1 | 1 |
| 372 | Larvae | Dragging | Male eld's deer (stall) | 50 | 1 | 0 | 1 |

|     |        |          |                         |    |   |   |   |
|-----|--------|----------|-------------------------|----|---|---|---|
| 373 | Larvae | Dragging | Male eld's deer (stall) | 50 | 1 | 0 | 1 |
| 374 | Larvae | Dragging | Male eld's deer (stall) | 50 | 1 | 0 | 1 |
| 375 | Larvae | Dragging | Male eld's deer (stall) | 50 | 1 | 0 | 1 |
| 376 | Larvae | Dragging | Male eld's deer (stall) | 50 | 1 | 0 | 1 |
| 377 | Larvae | Dragging | Male eld's deer (stall) | 50 | 1 | 0 | 1 |
| 378 | Larvae | Dragging | Male eld's deer (stall) | 50 | 1 | 0 | 1 |
| 379 | Larvae | Dragging | Male eld's deer (stall) | 50 | 1 | 0 | 1 |
| 380 | Larvae | Dragging | Male eld's deer (stall) | 50 | 1 | 0 | 1 |
| 381 | Larvae | Dragging | Male eld's deer (stall) | 50 | 1 | 1 | 1 |
| 382 | Larvae | Dragging | Male eld's deer (stall) | 50 | 1 | 0 | 1 |
| 383 | Larvae | Dragging | Male eld's deer (stall) | 50 | 1 | 0 | 0 |
| 384 | Larvae | Dragging | Male eld's deer (stall) | 50 | 1 | 1 | 1 |
| 385 | Larvae | Dragging | Male eld's deer (stall) | 43 | 1 | 1 | 0 |
| 386 | Larvae | Dragging | Male eld's deer (stall) | 11 | 1 | 1 | 0 |
| 387 | Nymph  | Picking  | Eld's deer K222         | 1  | 0 | 0 | 1 |
| 388 | Nymph  | Picking  | Female spotted deer     | 4  | 0 | 0 | 1 |
| 389 | Nymph  | Picking  | Eld's deer K294         | 10 | 0 | 0 | 0 |
| 390 | Nymph  | Picking  | Eld's deer K222         | 1  | 0 | 1 | 0 |
| 391 | Nymph  | Picking  | Hybrid cow              | 5  | 1 | 0 | 0 |
| 392 | F      | Picking  | Spotted deer            | 1  | 1 | 0 | 0 |
| 393 | M      | Picking  | Tapir (Kanya)           | 1  | 1 | 0 | 1 |
| 394 | F      | Picking  | Hybrid cow              | 1  | 0 | 0 | 0 |
| 395 | F      | Picking  | Hybrid cow              | 1  | 0 | 0 | 0 |
| 396 | F      | Picking  | Hybrid cow              | 1  | 0 | 0 | 0 |
| 397 | F      | Picking  | Eld's deer K295         | 1  | 0 | 0 | 0 |
| 398 | F      | Picking  | Eld's deer K295         | 1  | 0 | 1 | 0 |
| 399 | M      | Picking  | Eld's deer K295         | 1  | 0 | 0 | 1 |
| 400 | F      | Picking  | Hybrid cow              | 1  | 0 | 0 | 0 |
| 401 | F      | Picking  | Hybrid cow              | 1  | 0 | 0 | 0 |

|     |        |          |                         |    |   |   |   |
|-----|--------|----------|-------------------------|----|---|---|---|
| 402 | F      | Picking  | Hybrid cow              | 1  | 0 | 0 | 0 |
| 403 | F      | Picking  | Eld's deer K222         | 1  | 0 | 0 | 0 |
| 404 | F      | Picking  | Eld's deer K222         | 1  | 0 | 0 | 0 |
| 405 | M      | Picking  | Eld's deer K222         | 1  | 0 | 0 | 0 |
| 406 | F      | Picking  | Eld's deer K205         | 1  | 0 | 0 | 0 |
| 407 | F      | Picking  | Eld's deer K205         | 1  | 0 | 0 | 0 |
| 408 | M      | Picking  | Hybrid cow              | 1  | 0 | 0 | 0 |
| 409 | F      | Picking  | Hybrid cow              | 1  | 0 | 1 | 0 |
| 410 | F      | Picking  | Hybrid cow              | 1  | 0 | 1 | 0 |
| 411 | F      | Picking  | Hybrid cow              | 1  | 0 | 0 | 1 |
| 412 | F      | Picking  | Hybrid cow              | 1  | 0 | 0 | 0 |
| 413 | F      | Picking  | Hybrid cow              | 1  | 0 | 0 | 0 |
| 414 | F      | Picking  | Hybrid cow              | 1  | 0 | 0 | 0 |
| 415 | Larvae | Dragging | Tapir (stall)           | 50 | 1 | 0 | 1 |
| 416 | Larvae | Dragging | Tapir (stall)           | 50 | 1 | 0 | 1 |
| 417 | Larvae | Dragging | Tapir (stall)           | 50 | 1 | 0 | 0 |
| 418 | Larvae | Dragging | Tapir (stall)           | 50 | 1 | 0 | 0 |
| 419 | Larvae | Dragging | Tapir (stall)           | 50 | 1 | 0 | 0 |
| 420 | Larvae | Dragging | Tapir (stall)           | 50 | 1 | 0 | 0 |
| 421 | Larvae | Dragging | Tapir (stall)           | 50 | 1 | 0 | 0 |
| 422 | Larvae | Dragging | Tapir (stall)           | 50 | 1 | 0 | 0 |
| 423 | Larvae | Dragging | Tapir (stall)           | 50 | 0 | 0 | 0 |
| 424 | Larvae | Dragging | Tapir (stall)           | 41 | 0 | 0 | 0 |
| 425 | Larvae | Dragging | Tapir (stall)           | 50 | 1 | 0 | 0 |
| 426 | Larvae | Dragging | Male eld's deer (stall) | 50 | 0 | 0 | 0 |
| 427 | Larvae | Dragging | Male eld's deer (stall) | 50 | 0 | 0 | 0 |
| 428 | Larvae | Dragging | Male eld's deer (stall) | 50 | 0 | 0 | 0 |
| 429 | Larvae | Dragging | Male eld's deer (stall) | 50 | 0 | 0 | 0 |
| 430 | Larvae | Dragging | Male eld's deer (stall) | 50 | 1 | 0 | 0 |

|     |        |          |                         |        |     |    |     |
|-----|--------|----------|-------------------------|--------|-----|----|-----|
| 431 | Larvae | Dragging | Male eld's deer (stall) | 50     | 1   | 0  | 0   |
| 432 | Larvae | Dragging | Male eld's deer (stall) | 50     | 1   | 0  | 0   |
| 433 | Larvae | Dragging | Male eld's deer (stall) | 50     | 0   | 0  | 0   |
| 434 | Larvae | Dragging | Male eld's deer (stall) | 50     | 0   | 0  | 0   |
| 435 | Larvae | Dragging | Male eld's deer (stall) | 50     | 0   | 0  | 0   |
| 436 | Larvae | Dragging | Male eld's deer (stall) | 50     | 0   | 0  | 0   |
| 437 | Larvae | Dragging | Male eld's deer (stall) | 50     | 0   | 0  | 0   |
| 438 | Larvae | Dragging | Male eld's deer (stall) | 50     | 0   | 0  | 0   |
| 439 | Larvae | Dragging | Male eld's deer (stall) | 50     | 0   | 0  | 0   |
| 440 | Larvae | Dragging | Male eld's deer (stall) | 50     | 0   | 0  | 0   |
| 441 | Larvae | Dragging | Male eld's deer (stall) | 50     | 0   | 0  | 0   |
| 442 | Larvae | Dragging | Male eld's deer (stall) | 50     | 0   | 0  | 0   |
| 443 | Larvae | Dragging | Male eld's deer (stall) | 50     | 0   | 0  | 0   |
| 444 | Larvae | Dragging | Male eld's deer (stall) | 50     | 0   | 0  | 0   |
| 445 | Larvae | Dragging | Male eld's deer (stall) | 50     | 0   | 0  | 0   |
| 446 | Larvae | Dragging | Male eld's deer (stall) | 30     | 0   | 0  | 0   |
| 447 | Nymph  | Dragging | Tapir (stall)           | 10     | 0   | 0  | 0   |
| 448 | Nymph  | Dragging | Tapir (stall)           | 5      | 0   | 0  | 0   |
| 449 | Nymph  | Dragging | Male eld's deer (stall) | 2      | 0   | 0  | 0   |
| 449 |        |          |                         | 10,436 | 248 | 73 | 133 |
